# Supplementary material for: A Review of Soft Techniques for Electromagnetic Assessment of Concrete Condition
Source: Hindawi journal article supplement (doi:10.1155/2012/935468), 2012-01-01
Supplement: f1 [file 935468.f1.doc]

**Supplementary file**

The experimental data set used can be downloaded in: http://www.enacom.com.br/doc/gprenacomsenai.zip

Files compressed in gprenacomsenai.zip:

- gpr16GHzantenna.mat

- gpr23GHzantenna.mat

- readme.txt

**Title: A Review of Soft Techniques for Electromagnetic Assessment of Concrete Condition**

Source: MALA ProEx GPR system from EEUFMG using two different high frequency antennas, one at a time: 1.6 and 2.3 GHz. Three concrete blocks with the same dimensions but different inclusions were probed in a semi-anechoic chamber at CIMATEC/Senai from July 26th to July 29th of 2011.

Each file (gprXXGHzantenna.mat) of GPR data has 324 training sample rows (alltraindataXX) and 90 testing sample rows (alltestdataXX).

The A-scans samples (attributes) with mV values go from 1 to:

- 240th column for 1.6GHz antenna;

- 200th column for 2.3GHz antenna.

The last 3 columns of each row registers:

- Inclusion existence: 0 for no and 1 for yes;

- DC (static) relative permittivity of the medium: 1 for air, 80 for conductor and 1e7 for PVC + water;

- Depth (cm) of inclusion: 3.5 for top, 10.5 for bottom and 0 for no inclusion.

Missing Attribute Values: none.

Class Distribution: 33.3% for each of 3 classes.
